# Supplementary material for: Concept of triphenylamine side chains with four electroactive nitrogen centers toward record-high stable electrochromic polyamides
Source: Royal Society of Chemistry journal article supplement (doi:10.1039/d4tc00735b), 2024-01-01
Supplement: d4tc00735b1.pdf [file d4tc00735b1.pdf]

## Supporting Information

### **Concept of Triphenylamine Side Chains with Four Electroactive Nitrogen Centers toward Record-High Stable Electrochromic Polyamides**

Yaw-Terng Chern,<sup>\*a</sup> Zhe-Yuan Zhang,<sup>a</sup> Jane-Jen Wang,<sup>b</sup> Pei-Ling Lin,<sup>a</sup> and Yu-Cheng Chiu,<sup>a</sup> Yu-Jie Wang,<sup>c</sup> Chin-Hsuan Lin,<sup>c</sup> and Guey-Sheng Liou<sup>\*c</sup>

<sup>a</sup>Department of Chemical Engineering, National Taiwan University of Science and Technology, Taipei, Taiwan

<sup>b</sup>The Department of Nursing, School of Nursing, National Taipei University of Nursing and Health Sciences, Taipei, Taiwan

<sup>c</sup>Institute of Polymer Science and Engineering, National Taiwan University, Taipei, Taiwan

Email of the corresponding authors: ytchern@mail.ntust.edu.tw; gsliau@ntu.edu.tw.

## List of Contents for Supplementary Information:

---

|                                                                                                                                                                                                                                                                                                                                                             |    |
|-------------------------------------------------------------------------------------------------------------------------------------------------------------------------------------------------------------------------------------------------------------------------------------------------------------------------------------------------------------|----|
| <b>Table S1.</b> Inherent Viscosity and Solubility of PAs. ....                                                                                                                                                                                                                                                                                             | 3  |
| <b>Table S2.</b> Thermal Properties of PAs. ....                                                                                                                                                                                                                                                                                                            | 4  |
| <b>Table S3.</b> Optical and Electrochemical Data Collected for Coloration Efficiency. ....                                                                                                                                                                                                                                                                 | 5  |
| <b>Table S4.</b> Optical and Electrochemical Data Collected for Coloration Efficiency. ....                                                                                                                                                                                                                                                                 | 6  |
| <b>Table S5.</b> Optical and Electrochemical Data Collected for Coloration Efficiency. ....                                                                                                                                                                                                                                                                 | 7  |
| <b>Table S6.</b> NIR Absorption of Polymers at the First Stage of Oxidation. ....                                                                                                                                                                                                                                                                           | 8  |
| <b>Fig. S1</b> FT-IR spectra of the compounds <b>1</b> and <b>2</b> . ....                                                                                                                                                                                                                                                                                  | 9  |
| <b>Fig. S2</b> FT-IR spectra of the compounds <b>3</b> , <b>4</b> , and PA <b>5b</b> . ....                                                                                                                                                                                                                                                                 | 10 |
| <b>Fig. S3</b> (a) $^1\text{H}$ and (b) $^{13}\text{C}$ NMR spectra of compound <b>1</b> . (d-solvent: pyridine- $d_5$ ).....                                                                                                                                                                                                                               | 11 |
| <b>Fig. S4</b> (a) $^1\text{H}$ and (b) $^{13}\text{C}$ NMR spectra of compound <b>2</b> . (d-solvent: pyridine- $d_5$ ).....                                                                                                                                                                                                                               | 12 |
| <b>Fig. S5</b> $^{13}\text{C}$ NMR spectrum of compound <b>4</b> . (d-solvent: pyridine- $d_5$ ) .....                                                                                                                                                                                                                                                      | 13 |
| <b>Fig. S6</b> ESIMS spectrum of compound <b>1</b> . ....                                                                                                                                                                                                                                                                                                   | 14 |
| <b>Fig. S7</b> ESIMS spectrum of compound <b>2</b> . ....                                                                                                                                                                                                                                                                                                   | 15 |
| <b>Fig. S8</b> ESIMS spectrum of compound <b>4</b> . ....                                                                                                                                                                                                                                                                                                   | 16 |
| <b>Fig. S9</b> Thickness and surface morphology of PAs (a) <b>5a</b> , (b) <b>5b</b> , and (c) <b>5c</b> . ....                                                                                                                                                                                                                                             | 17 |
| <b>Fig. S10</b> $^1\text{H}$ NMR spectra of PA <b>5b</b> . (d-solvent: pyridine- $d_5$ ).....                                                                                                                                                                                                                                                               | 18 |
| <b>Fig. S11</b> $^1\text{H}$ NMR spectra of PA <b>5c</b> . (d-solvent: pyridine- $d_5$ ).....                                                                                                                                                                                                                                                               | 19 |
| <b>Fig. S12</b> TGA thermograms of PAs <b>5</b> at a heating rate of $20\text{ }^\circ\text{C min}^{-1}$ from $50$ to $800\text{ }^\circ\text{C}$ . ....                                                                                                                                                                                                    | 20 |
| <b>Fig. S13</b> DSC traces of PAs <b>5</b> at a heating rate of $20\text{ }^\circ\text{C min}^{-1}$ from $50$ to $350\text{ }^\circ\text{C}$ . ....                                                                                                                                                                                                         | 21 |
| <b>Fig. S14</b> Potential step absorptometry and current consumption of PA <b>5a</b> (in MeCN with $0.1\text{ M}$ TBAP as the supporting electrolyte) by applying a potential step $0.0\text{ V} \leftrightarrow 0.5\text{ V}$ , and cycle time $20\text{ sec}$ . ....                                                                                      | 22 |
| <b>Fig. S15</b> Potential step absorptometry during the continuous cycling test of PA <b>5a</b> (in MeCN with $0.1\text{ M}$ TBAP as the supporting electrolyte) by switching potentials step $0.00\text{ V} \leftrightarrow 0.50\text{ V}$ , with a cycle time of $5\text{ h}$ and $5\text{ min}$ for coloring and bleaching processes, respectively. .... | 23 |
| <b>Fig. S16</b> Absorbance spectra of (a) <b>P1</b> and (b) <b>P2</b> thin-film electrode in $0.1\text{ M}$ TBAP/MeCN at different applied potentials. ....                                                                                                                                                                                                 | 24 |

**Table S1.** Inherent Viscosity and Solubility<sup>b</sup> of PAs.

| PA | $\eta_{inh}(\text{dL/g})^a$ | NMP | DMAc | <i>o</i> -Chlorophenol | THF |
|----|-----------------------------|-----|------|------------------------|-----|
| 5a | 0.40                        | +   | ++   | +—                     | +—  |
| 5b | 0.32                        | +   | +    | +—                     | —   |
| 5c | 0.45                        | +   | +    | +—                     | —   |

<sup>a</sup>Measured in NMP on 0.5 g/dL at 30 °C. <sup>b</sup>Qualitative solubility was determined using 0.01 g of polymer in 1 ml of solvent. ++ (soluble at room temperature); + (soluble on heating at 60°C); +— (partially soluble on heating at 60°C); — (insoluble in hot solvent).

**Table S2.** Thermal Properties of PAs.

| PA | T <sub>g</sub> (°C) <sup>a</sup> | T <sub>d</sub> (°C) <sup>b</sup> |                   | Char yield <sup>c</sup><br>(%) |
|----|----------------------------------|----------------------------------|-------------------|--------------------------------|
|    |                                  | In Air                           | In N <sub>2</sub> |                                |
| 5a | 178                              | 425                              | 467               | 59                             |
| 5b | 181                              | 421                              | 464               | 63                             |
| 5c | 194                              | 421                              | 470               | 65                             |

<sup>a</sup>Temperature at which the middle of the heat capacity change occurred from the second DSC heating scan at a heating rate of 20°C/min. <sup>b</sup>Temperature at which 10% weight loss recorded by thermogravimetry at a heating rate of 20°C/min. <sup>c</sup>Residual weight% at 800°C in nitrogen.

**Table S3.** Optical and Electrochemical Data Collected for Coloration Efficiency.

| Cycles <sup>a</sup> | $\Delta OD^b$ | $\Delta T(\%)^c$ | $Q(\text{mC}/\text{cm}^2)^d$ | $\eta(\text{cm}^2/\text{C})^e$ | decay( $\%)^f$ |
|---------------------|---------------|------------------|------------------------------|--------------------------------|----------------|
| 1                   | 0.376         | 57.9             | 1.84                         | 204                            | 0.00           |
| 2500                | 0.370         | 57.4             | 1.82                         | 203                            | 0.49           |
| 5000                | 0.363         | 56.6             | 1.79                         | 202                            | 0.98           |
| 7500                | 0.357         | 56.0             | 1.78                         | 199                            | 2.45           |
| 10000               | 0.355         | 55.8             | 1.78                         | 199                            | 2.45           |
| 12500               | 0.339         | 54.3             | 1.74                         | 194                            | 4.90           |
| 15000               | 0.337         | 54.0             | 1.73                         | 194                            | 4.90           |
| 17500               | 0.329         | 53.1             | 1.71                         | 192                            | 5.88           |
| 20000               | 0.323         | 52.4             | 1.69                         | 191                            | 6.37           |
| 22500               | 0.321         | 52.2             | 1.69                         | 190                            | 6.86           |
| 24000               | 0.307         | 50.7             | 1.64                         | 186                            | 8.82           |

<sup>a</sup>Times of cyclic scan of **5a** by applying potential step: 0.0 V  $\leftrightarrow$  0.5 V (V vs. Ag/AgCl). <sup>b</sup>Optical density change at 1404 nm. <sup>c</sup>Optical transmittance change at 1404 nm. <sup>d</sup>Ejected charge determined from in situ experiments. <sup>e</sup>Coloration efficiency is derived from the equation  $\eta = \Delta OD/Q$ . <sup>f</sup>Decay of coloration efficiency after cyclic scans.

**Table S4.** Optical and Electrochemical Data Collected for Coloration Efficiency.

| Cycles <sup>a</sup> | $\Delta OD^b$ | $\Delta T(\%)^c$ | $Q(\text{mC}/\text{cm}^2)^d$ | $\eta(\text{cm}^2/\text{C})^e$ | decay( $\% \text{)^f$ |
|---------------------|---------------|------------------|------------------------------|--------------------------------|-----------------------|
| 1                   | 0.331         | 53.4             | 2.97                         | 111                            | 0.00                  |
| 2000                | 0.315         | 51.6             | 2.87                         | 110                            | 0.90                  |
| 4000                | 0.310         | 51.0             | 2.86                         | 108                            | 2.70                  |
| 6000                | 0.307         | 50.7             | 2.84                         | 108                            | 2.70                  |
| 8000                | 0.300         | 49.9             | 2.80                         | 107                            | 3.60                  |
| 10000               | 0.283         | 48.0             | 2.76                         | 103                            | 7.20                  |
| 12000               | 0.281         | 47.7             | 2.75                         | 102                            | 8.11                  |
| 14000               | 0.281         | 47.6             | 2.75                         | 102                            | 8.11                  |
| 16000               | 0.278         | 47.3             | 2.74                         | 101                            | 9.01                  |
| 18000               | 0.276         | 47.1             | 2.73                         | 101                            | 9.01                  |
| 20000               | 0.267         | 46.0             | 2.68                         | 100                            | 9.91                  |

<sup>a</sup>Times of cyclic scan of **5a** by applying potential step: 0.0 V  $\leftrightarrow$  0.5 V (V vs. Ag/AgCl). <sup>b</sup>Optical density change at 440 nm. <sup>c</sup>Optical transmittance change at 440 nm. <sup>d</sup>Ejected charge determined from in situ experiments. <sup>e</sup>Coloration efficiency is derived from the equation:  $\eta = \Delta OD/Q$ . <sup>f</sup>Decay of coloration efficiency after cyclic scans.

**Table S5.** Optical and Electrochemical Data Collected for Coloration Efficiency.

| Cycles <sup>a</sup> | $\Delta$ OD <sup>b</sup> | $\Delta$ T(%) <sup>c</sup> | Q(mC/cm <sup>2</sup> ) <sup>d</sup> | $\eta$ (cm <sup>2</sup> /C) <sup>e</sup> | decay(%) <sup>f</sup> |
|---------------------|--------------------------|----------------------------|-------------------------------------|------------------------------------------|-----------------------|
| 1                   | 1.05                     | 91.1                       | 7.22                                | 145                                      | 0.00                  |
| 500                 | 1.03                     | 90.7                       | 7.20                                | 144                                      | 0.69                  |
| 1000                | 1.03                     | 90.6                       | 7.19                                | 143                                      | 1.38                  |
| 1500                | 1.02                     | 90.4                       | 7.17                                | 142                                      | 2.07                  |
| 2000                | 1.02                     | 90.3                       | 7.16                                | 142                                      | 2.07                  |
| 2500                | 1.00                     | 90.0                       | 7.14                                | 140                                      | 3.45                  |
| 3000                | 0.96                     | 89.0                       | 7.08                                | 136                                      | 6.21                  |
| 3500                | 0.95                     | 88.7                       | 7.06                                | 134                                      | 7.59                  |
| 4000                | 0.93                     | 88.1                       | 6.91                                | 134                                      | 7.59                  |
| 4500                | 0.92                     | 88.1                       | 6.91                                | 134                                      | 7.59                  |
| 5000                | 0.83                     | 85.2                       | 6.42                                | 129                                      | 11.03                 |

<sup>a</sup>Times of cyclic scan of **5a** by applying potential step: 0.0 V  $\leftrightarrow$  0.7 V (V vs. Ag/AgCl). <sup>b</sup>Optical density change at 1404 nm. <sup>c</sup>Optical transmittance change at 1404 nm. <sup>d</sup>Ejected charge, determined from in situ experiments. <sup>e</sup>Coloration efficiency is derived from the equation:  $\eta = \Delta$  OD/Q. <sup>f</sup>Decay of coloration efficiency after cyclic scans.

**Table S6.** NIR Absorption of Polymers at the First Stage of Oxidation.

| Polymer | Potential <sup>a</sup> (V) | $\lambda_{\text{max}}$ <sup>b</sup> (nm) | Absorption Range <sup>b</sup> (nm) |
|---------|----------------------------|------------------------------------------|------------------------------------|
| 5a      | 0.50                       | 1404                                     | 800-1800                           |
| P1      | 0.75                       | 1062                                     | 800-1450                           |
| P2      | 0.40                       | 1252                                     | 800-1700                           |

<sup>a</sup>Applied potential for the first stage oxidation. <sup>b</sup>NIR absorption.



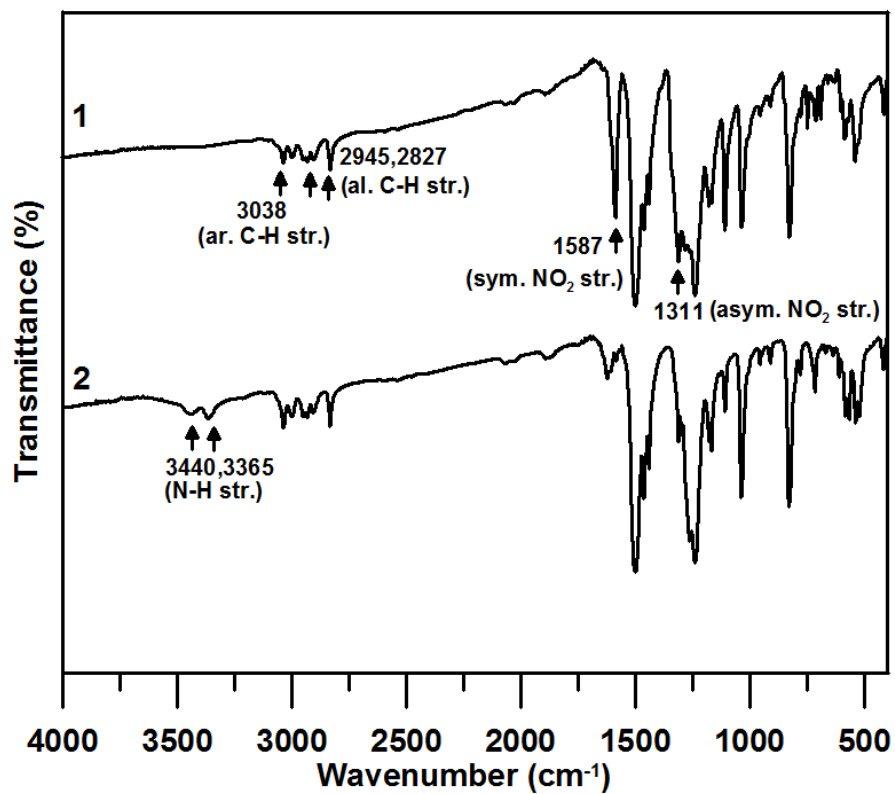

Fig. S1 FT-IR spectra of the compounds 1 and 2.

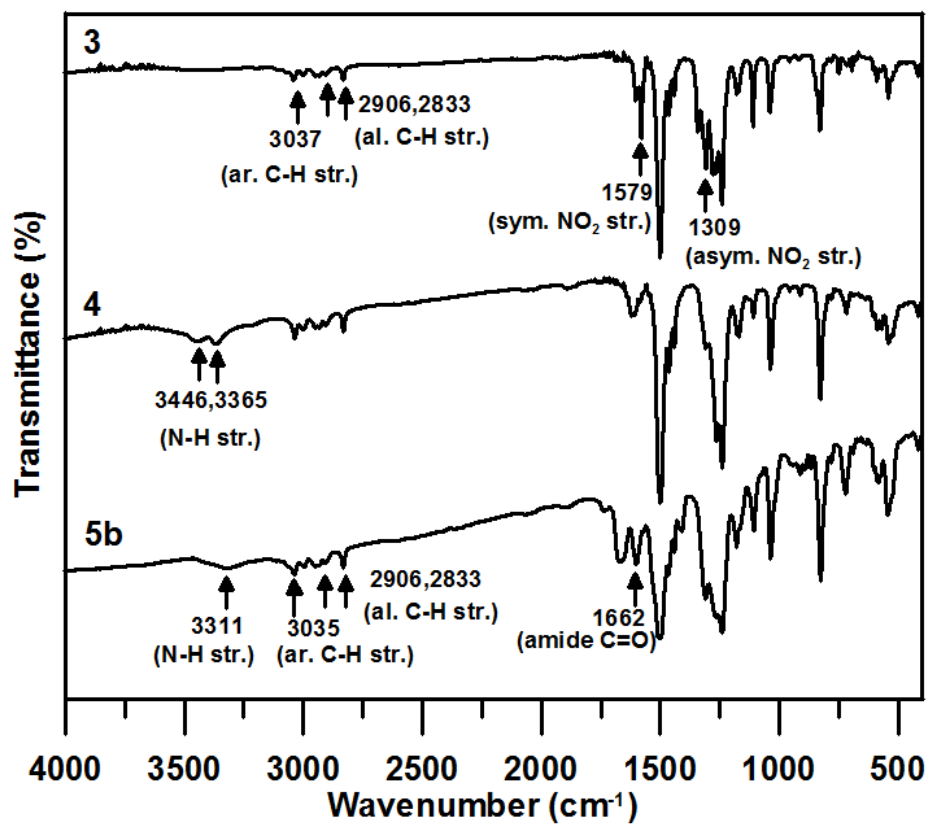

Fig. S2 FT-IR spectra of the compounds 3, 4, and PA 5b.

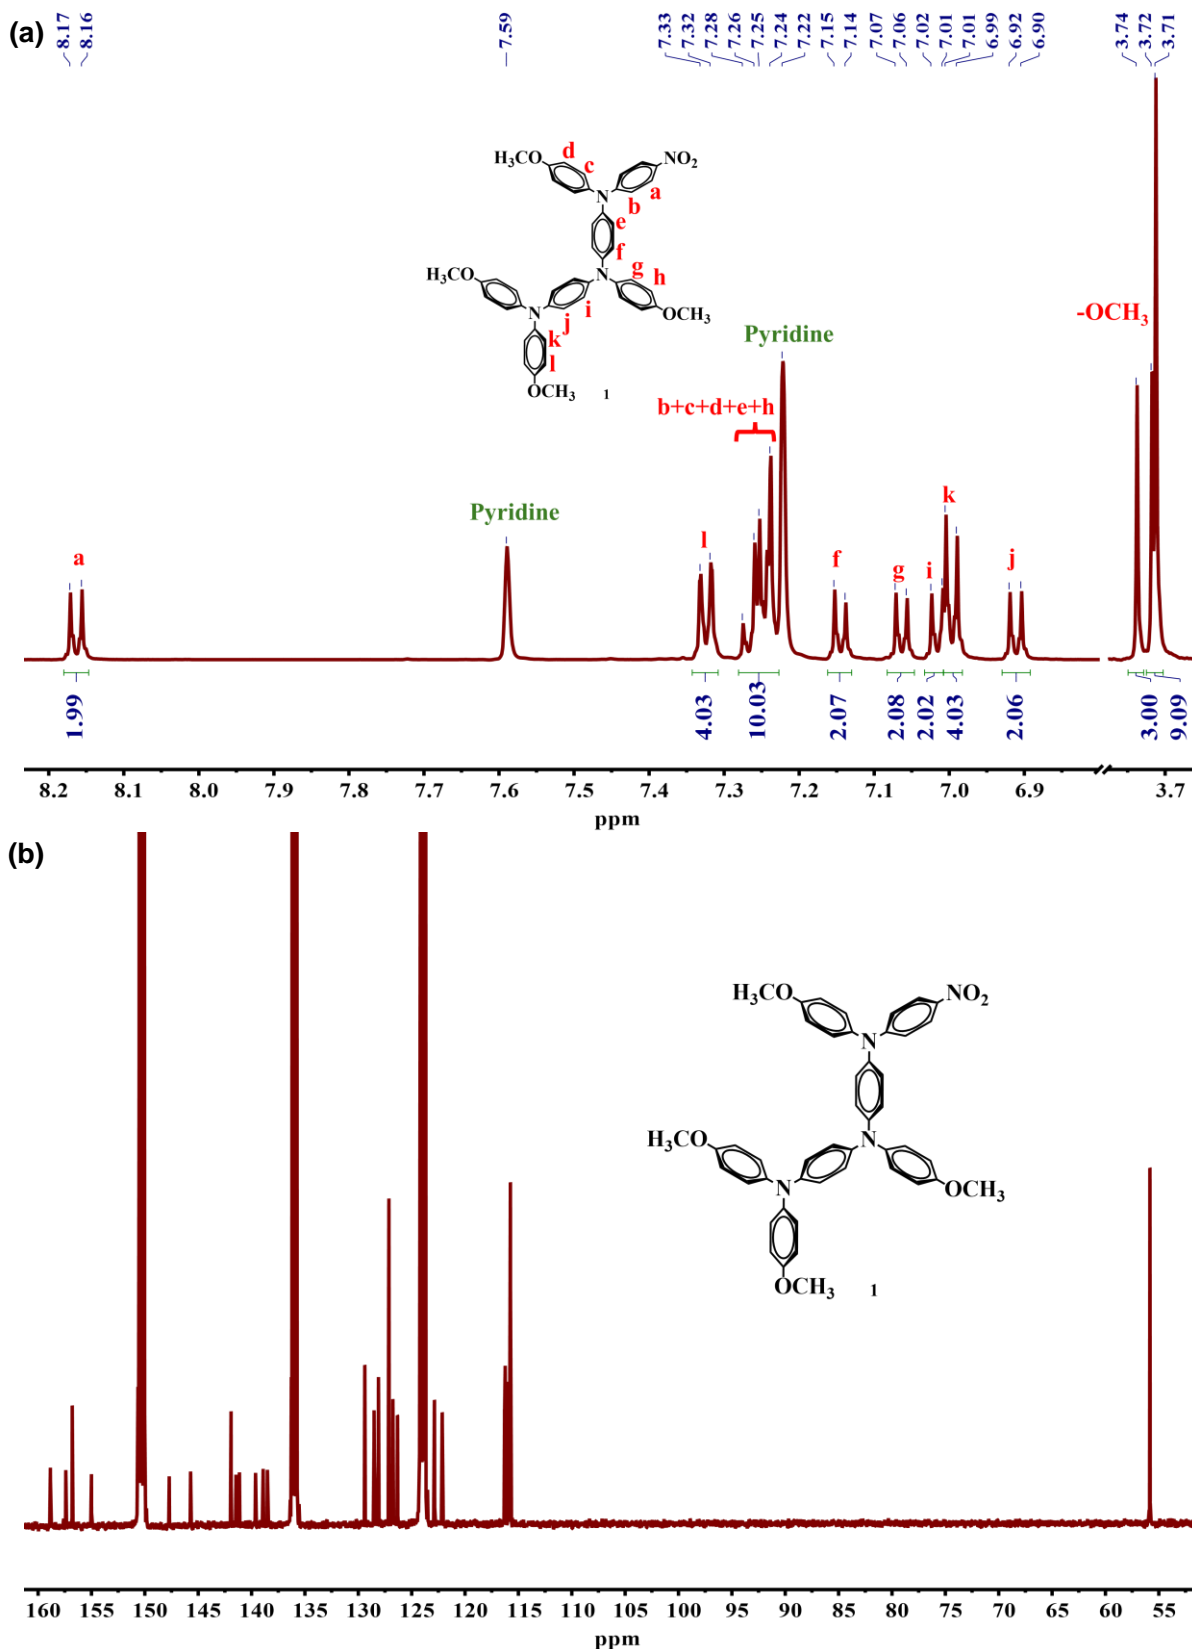

**Fig. S3** (a)  $^1\text{H}$  and (b)  $^{13}\text{C}$  NMR spectra of compound **1**. (d-solvent: Pyridine- $\text{d}_5$ )

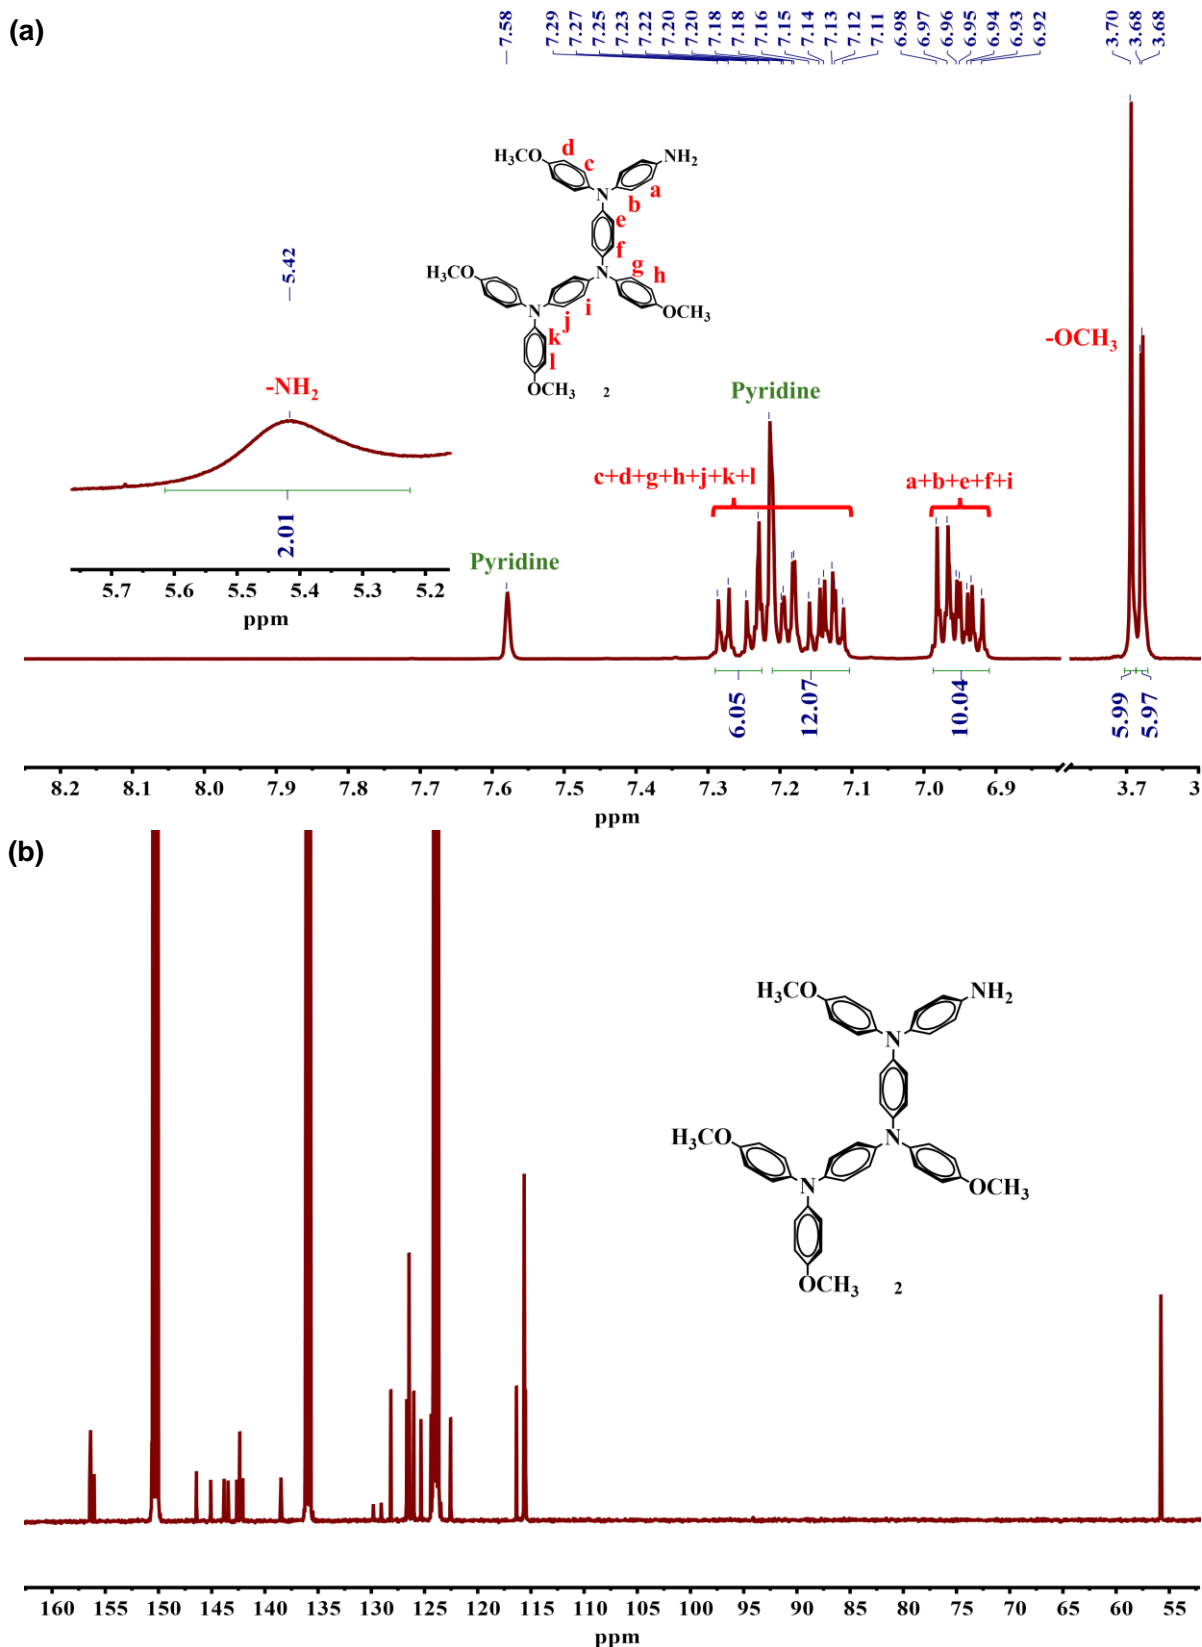

**Fig. S4** (a)  $^1\text{H}$  and (b)  $^{13}\text{C}$  NMR spectra of compound **2**. (d-solvent: Pyridine- $d_5$ )

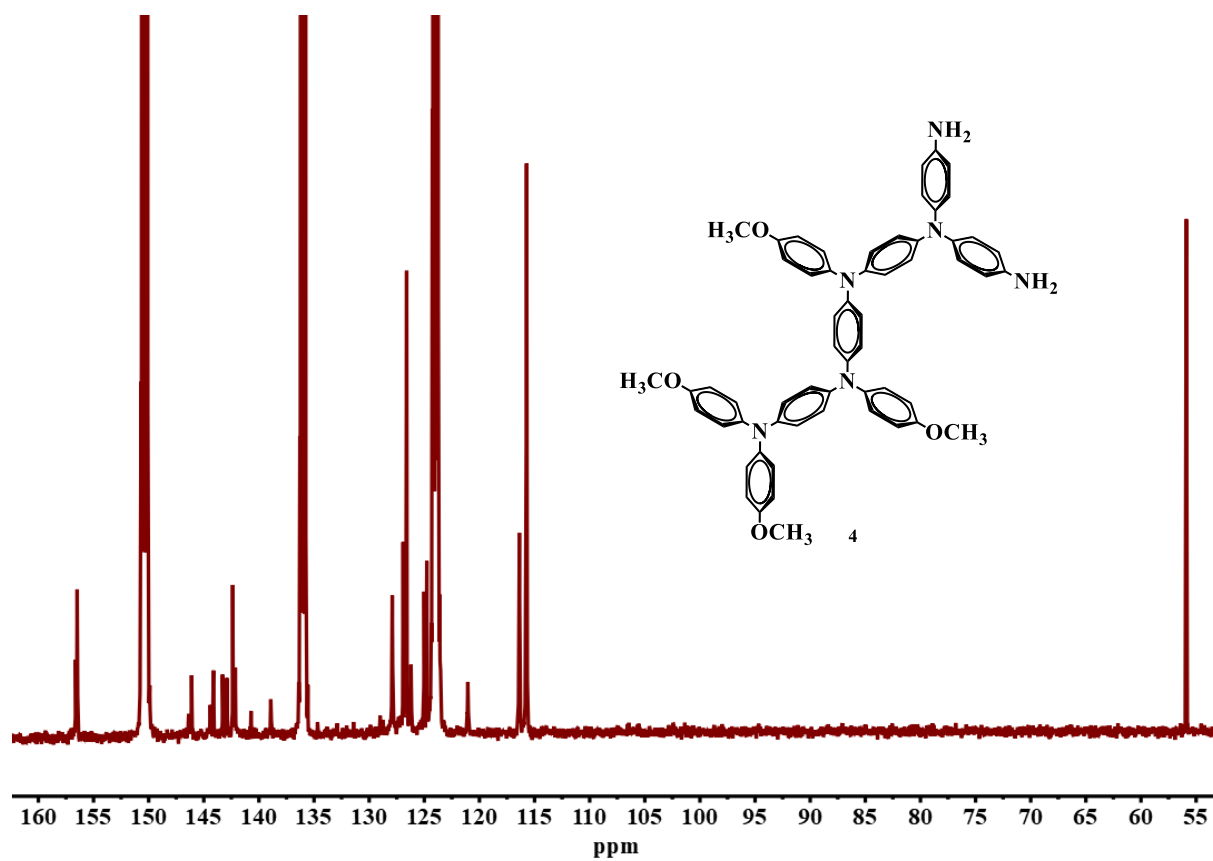

**Fig. S5**  $^{13}\text{C}$  NMR spectrum of compound 4. (d-solvent: Pyridine- $\text{d}_5$ )

data02\_20240416183538 #7-10 RT: 0.05-0.07 AV: 2 NL: 8.58E6  
T: FTMS + p ESI Full ms [600.0000-1500.0000]

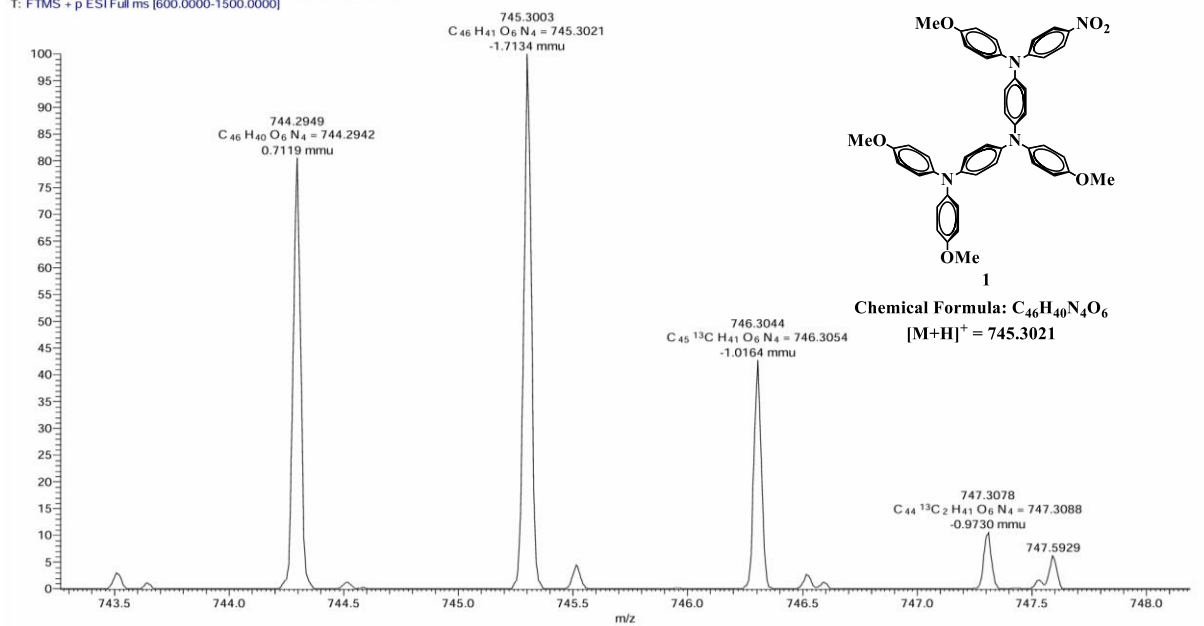

**Fig. S6** ESIMS spectrum of compound **1**.

data03 #5-14 RT: 0.04-0.10 AV: 5 NL: 1.58E7  
T: FTMS + p ESI Full ms [600.0000-1500.0000]

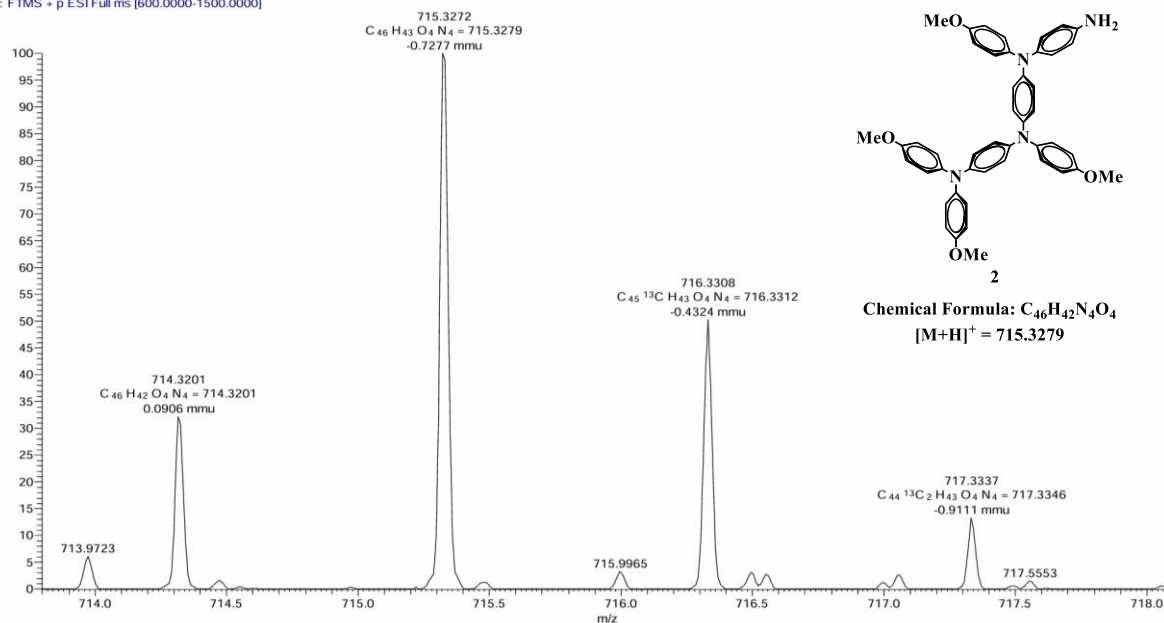

Fig. S7 ESIMS spectrum of compound 2.

data05\_20240416185102 #4-13 RT: 0.04-0.10 AV: 5 NL: 8.10E5  
T: FTMS + p ESI Full ms [600.0000-1500.0000]

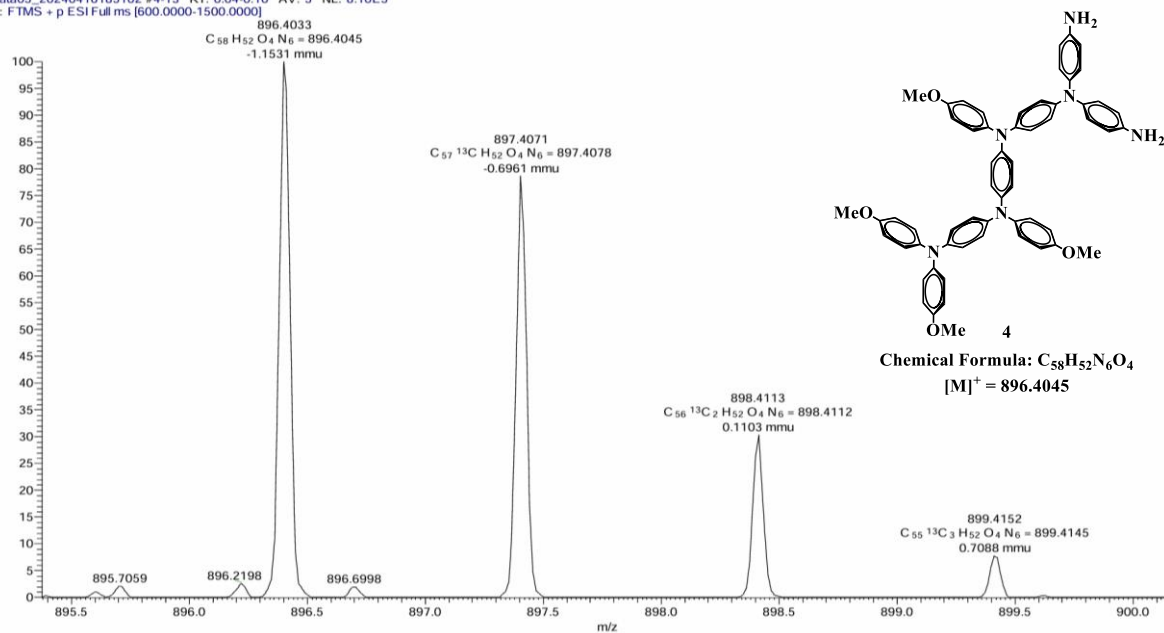

Fig. S8 ESIMS spectrum of compound 4.



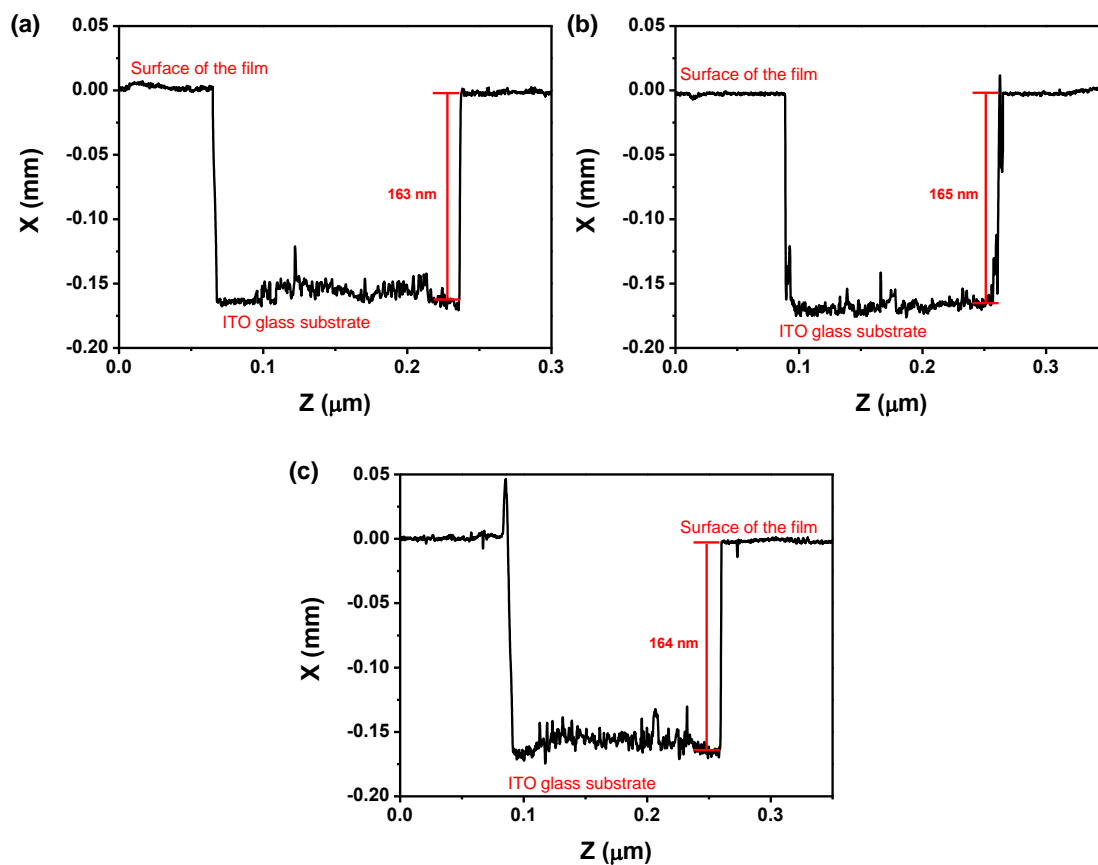

**Fig. S9** Thickness and surface morphology of PAs (a) **5a**, (b) **5b**, and (c) **5c**.

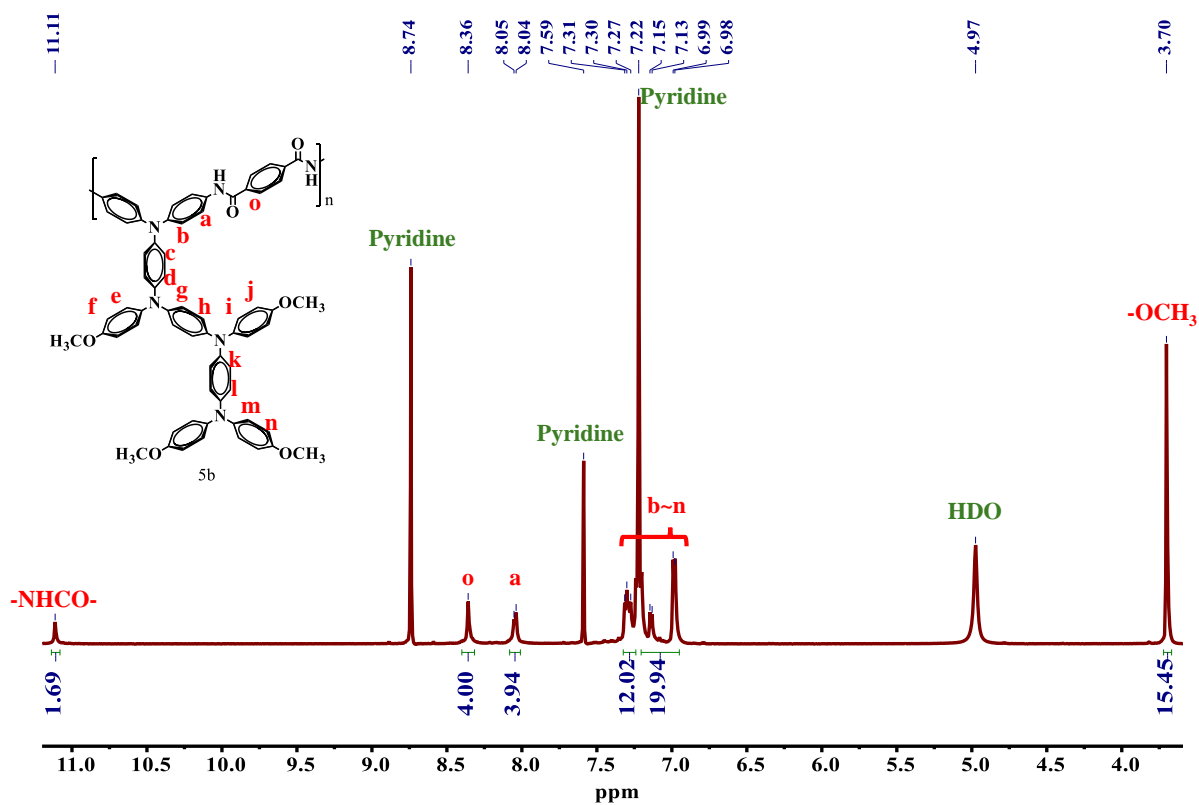

**Fig. S10**  $^1\text{H}$  NMR spectra of PA **5b**. (d-solvent: Pyridine- $d_5$ )

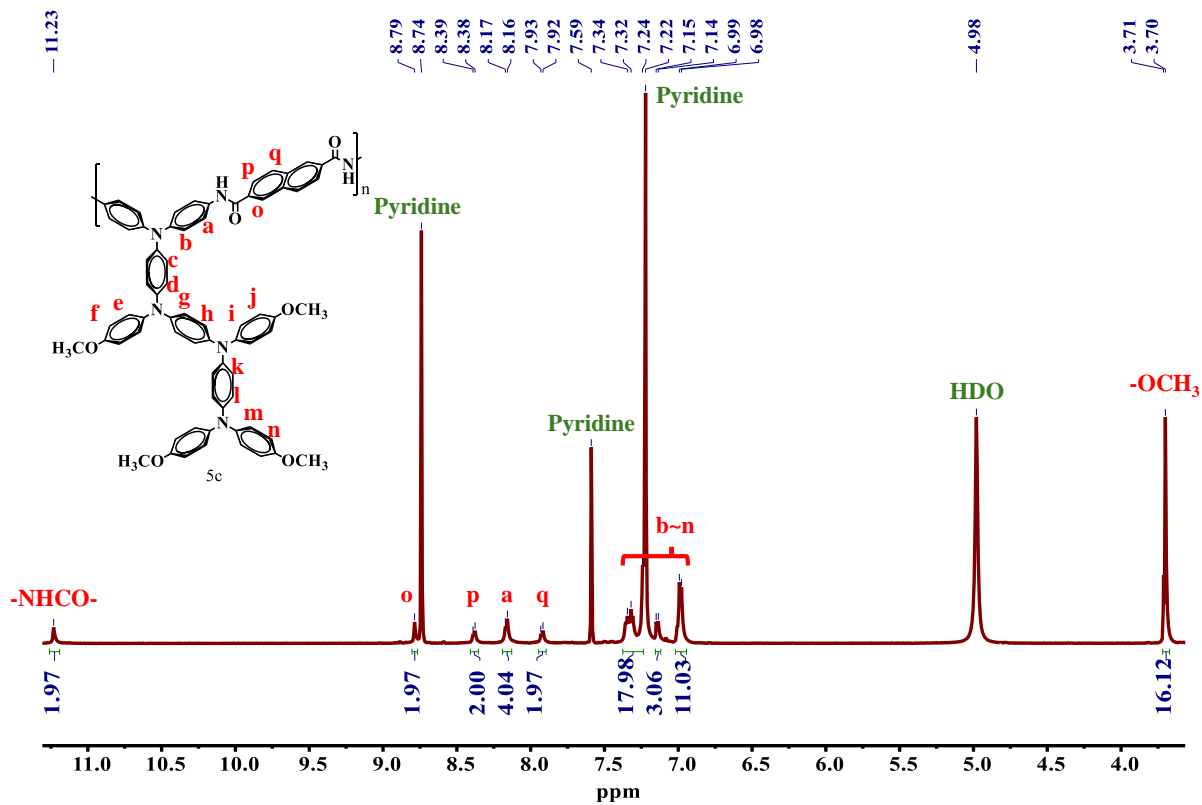

Fig. S11  $^1\text{H}$  NMR spectra of PA 5c. (d-solvent: Pyridine- $d_5$ )

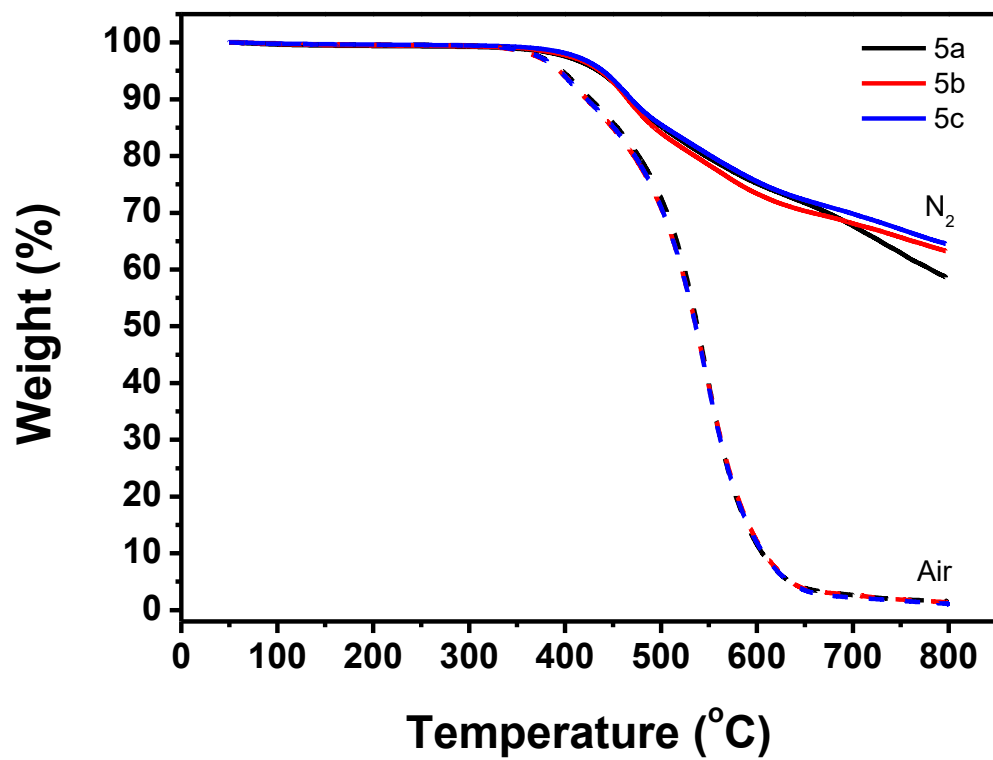

Fig. S12 TGA thermograms of PAs 5 at a heating rate of 20 °C min<sup>-1</sup> from 50 to 800 °C.

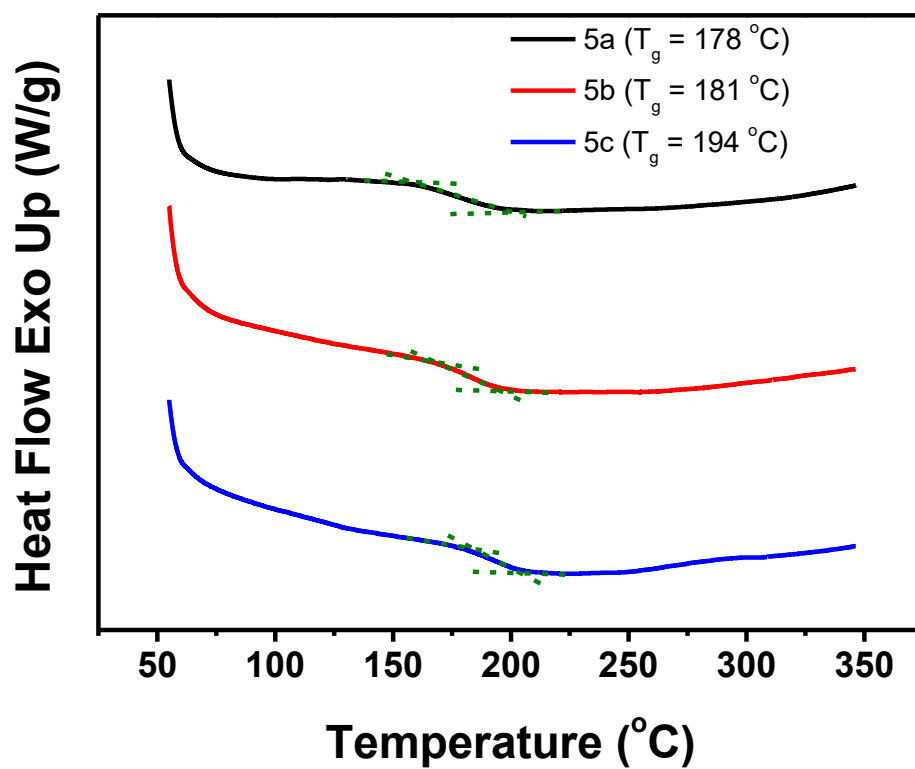

**Fig. S13** DSC traces of PAs **5** at a heating rate of  $20\text{ °C min}^{-1}$  from 50 to 350 °C.

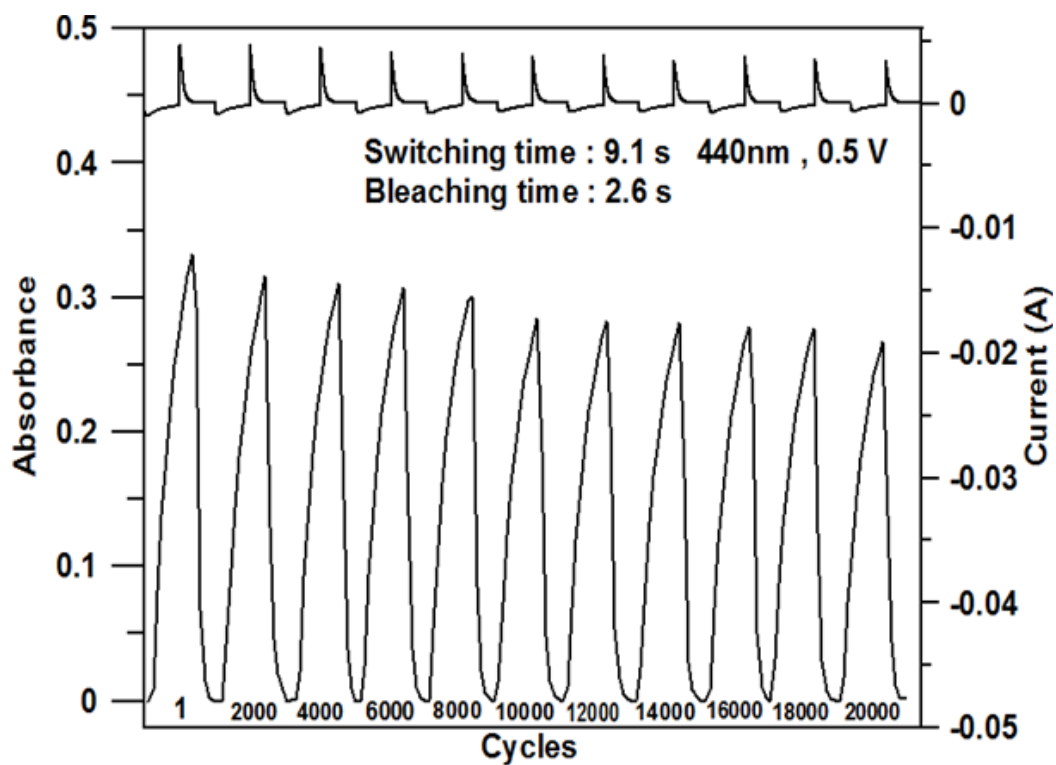

**Fig. S14** Potential step absorptometry and current consumption of PA **5a** (in MeCN with 0.1 M TBAP as the supporting electrolyte) by applying a potential step 0.0 V  $\leftrightarrow$  0.5 V, and cycle time 20 sec.

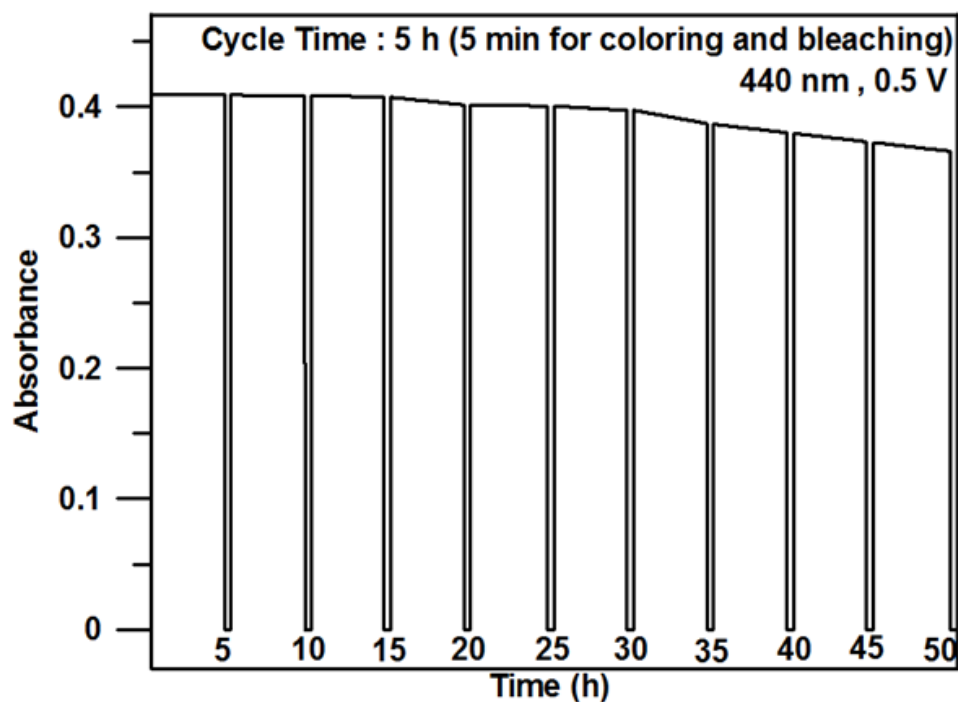

**Fig. S15** Potential step absorptiometry during the continuous cycling test of PA **5a** (in MeCN with 0.1 M TBAP as the supporting electrolyte) by switching potentials step 0.00 V  $\leftrightarrow$  0.50 V, with a cycle time of 5 h and 5 min for coloring and bleaching processes, respectively.

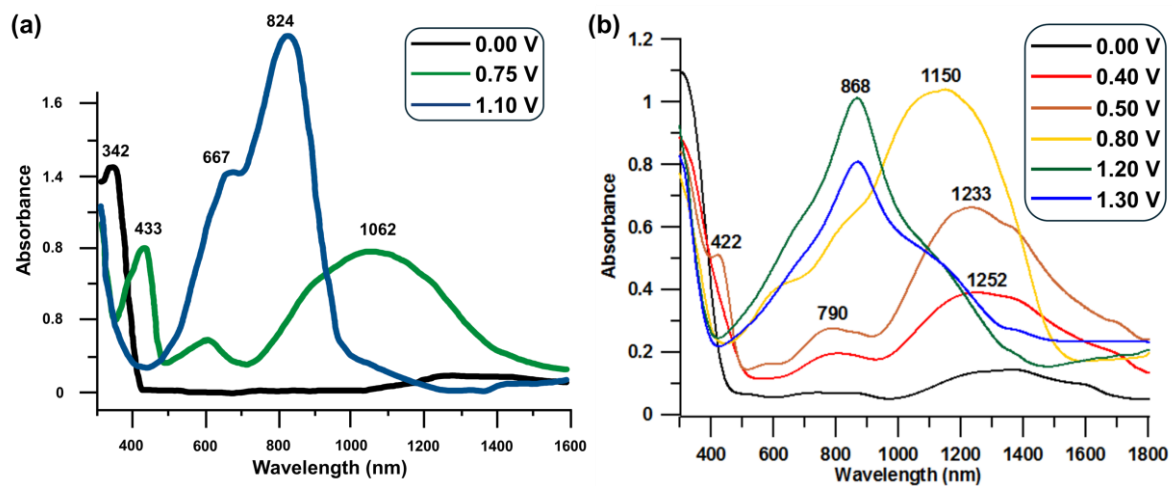

**Fig. S16** Absorbance spectra of (a) P1 and (b) P2 thin-film electrode in 0.1 M TBAP/MeCN at different applied potentials.
